# Supplementary material
Source: publisher figshare collection journal article supplement (https://future-science-group.figshare.com/ndownloader/files/28340373)
Supplement: Supplementary file 1 [file 28340373]

**Supplementary Table 2:** Allelic frequencies of significant *CYP2B6* in our cohort, compared to population frequencies

| **SNP** | **Ref_Allele** | **Ref_freq_study** | **Minor_Allele** | **Minor_freq_study** | **Wild_count** | **Heterozygous_count** | **Variants_count** | **HWE_p** | **Ref_freq_population*** | **Minor_freq_population*** |
| --- | --- | --- | --- | --- | --- | --- | --- | --- | --- | --- |
| rs1038376 | A | 0.708 | T | 0.292 | 27 | 21 | 5 | 0.756218373 | 0.688 | 0.312 |
| **rs10500282** | **T** | **0.811** | **C** | **0.189** | **34** | **18** | **1** | **0.426766766** | **0.665** | **0.335** |
| **rs4803419** | **C** | **0.66** | **T** | **0.34** | **22** | **26** | **5** | **0.495576998** | **0.711** | **0.289** |
| rs2279343 | A | 0.943 | G | 0.057 | 47 | 6 | 0 | 0.664079466 | 0.871 | 0.129 |
| **rs1057868** | **C** | **0.726** | **T** | **0.274** | **27** | **23** | **3** | **0.50427395** | **0.714** | **0.286** |
| rs11882424 | T | 0.953 | C | 0.047 | 48 | 5 | 0 | 0.717554692 | **0.948** | **0.052** |

*The 1000 Genomes Project Consortium

| The 1000 Genomes Project Consortium., Corresponding authors., Auton, A. et al. A global reference for human genetic variation. Nature 526, 68–74 (2015). |
| --- |
